# Supplementary material for: Cycloaddition of phosphanylidene-σ4-phosphoranes ArPPMe3and quinones to yield 1,3,2-dioxophospholanes
Source: Royal Society of Chemistry journal article supplement (doi:10.1039/b309165a), 2004-01-01
Supplement: b309165a.pdf [file b309165a.pdf]

**Electronic Supplementary Information for**  
**Cycloaddition of phosphanylidene- $\square^4$ -**  
**phosphoranes  $\text{ArP}=\text{PMe}_3$  and**  
**quinones to yield 1,3,2-**  
**dioxophospholanes**

Xufang Chen, Rhett C. Smith, and John D. Protasiewicz\*

Department of Chemistry, Case Western Reserve  
University, Cleveland, Ohio 44106-7078

**General** All manipulations were carried out in a MBraun Labmaster 130 dry box under an atmosphere of  $\text{N}_2$ . Acetonitrile was distilled from  $\text{CaH}_2$  under nitrogen; all other solvents were distilled from sodium benzophenone ketyl prior to use. Compounds **1** and **2** were prepared as previously reported (S. Shah and J. D. Protasiewicz *J. Chem. Soc. Chem. Commun.* 1998, 1585). NMR spectra were recorded on Varian Gemini instruments. Proton and phosphorus spectra are referenced to residual solvent signals and 85% phosphoric acid, respectively.

**3,5-di-tert-butylbenzo-2-(2,6-dimesityl-phenyl)-1,3,2-dioxaphospholane (4a).** To 0.361 g (0.858 mmol) of  $\text{DmpP}=\text{PMe}_3$  in 7 mL of toluene was added 0.189 g (0.858 mmol) 3,5-di-tert-butyl-*o*-benzoquinone in 7 mL of toluene dropwise with stirring. The yellow solution became lighter during the reaction. The solvent was evaporated after stirring 1.0 h further. The residue was extracted with *n*-hexane and filtered. White crystalline solid was obtained after solvent was removed under reduced pressure. Crystals suitable for X-ray analysis were grown from  $\text{Et}_2\text{O}/\text{CH}_3\text{CN}$  at  $-35^\circ\text{C}$ . Yield: 0.456 g (94.1 %). m. p. =  $154\text{--}156^\circ\text{C}$ .  $^1\text{H}$  NMR (300 MHz,  $\text{CDCl}_3$ ):  $\square = 1.23$  (s, 9H); 1.25 (s, 9H); 1.76 (s, 6H); 2.14 (s, 6H); 2.36 (s, 6H); 5.87 (d, 1H,  $J = 2.0$  Hz); 6.73 (d, 1H,  $J = 2.1$  Hz); 6.78 (s, 2H); 6.94 (dd, 2H,  $^3J_{\text{HH}} = 7.6$  Hz,  $^4J_{\text{PH}} = 1.8$  Hz); 6.99 (s, 2H); 7.47 (t, 1H,  $J = 7.6$  Hz).  $^{13}\text{C}\{^1\text{H}\}$  NMR (50.3 MHz,  $\text{CDCl}_3$ ):  $\square = 20.81$  (d,  $J = 5.3$  Hz); 21.33 (s); 21.67 (s); 29.89 (s); 31.63 (s); 34.36 (s); 34.45 (s); 108.07 (d,  $J = 1.6$  Hz); 116.34 (s); 127.86 (s); 128.28 (s); 130.07 (s); 131.56 (s); 134.01 (s); 135.94 (d,  $J = 2.0$  Hz); 136.64 (s); 136.86 (d,  $J = 1.7$  Hz); 137.32 (d,  $J = 4.6$  Hz); 143.69 (s); 144.30 (s); 144.69 (s); 146.94 (s); 147.06 (s).  $^{31}\text{P}\{^1\text{H}\}$  NMR (121.5 MHz,  $\text{CDCl}_3$ ):  $\square = 194.3$ . Anal. Calcd for  $\text{C}_{38}\text{H}_{45}\text{PO}_2$  (564.75): C, 80.81; H, 8.04. Found: C, 80.20; H, 8.17. HRMS (FAB) calcd for  $\text{C}_{38}\text{H}_{46}\text{O}_2\text{P}$  ( $\text{MH}^+$ ) 565.3235, found 565.3236.

**3,5-di-tert-butylbenzo-2-(2,4,6-tri-tert-butylphenyl)-1,3,2-dioxaphospholane (4b).** To 0.401 g (1.14 mmol)  $\text{Mes}^*\text{P}=\text{PMe}_3$  in 8 mL of toluene was added a solution of 0.251 g (1.14 mmol) 3,5-di-tert-butyl-*o*-benzoquinone in 8 mL of toluene dropwise with stirring. The yellow solution became lighter and after 45 min, the solvent was evaporated. The residue was extracted with 10 mL of *n*-heptane. Solvent was removed under reduced

pressure until crystalline solid appeared. Yield: 0.555 g (98.0 %), m.p.  $100\text{--}101^\circ\text{C}$ .  $^1\text{H}$  NMR (300 MHz,  $\text{CDCl}_3$ ):  $\square = 1.12$  (s, 9H); 1.20 (s, 9H); 1.24 (s, 9H); 1.52 (s, 18H); 6.65 (d, 1H,  $J = 1.9$  Hz); 6.75 (d, 1H,  $J = 2.2$  Hz); 7.01 (d, 2H,  $J = 1.0$  Hz).  $^{13}\text{C}\{^1\text{H}\}$  NMR (75.4 MHz,  $\text{CDCl}_3$ ):  $\square = 30.23$  (s); 31.02 (s); 31.57 (s); 34.14 (d,  $J = 9.2$  Hz); 34.36 (s); 34.44 (s); 34.54 (s); 39.49 (d,  $J = 2.7$  Hz); 108.03 (s); 115.70 (s); 121.21 (s); 134.22 (s); 141.28 (s); 142.41 (s); 144.00 (s); 146.94 (d,  $J = 7.4$  Hz); 149.54 (s); 156.62 (d,  $J = 6.8$  Hz).  $^{31}\text{P}\{^1\text{H}\}$  NMR (121.5 MHz,  $\text{CDCl}_3$ ):  $\square = 195.9$ . Anal. Calcd for  $\text{C}_{32}\text{H}_{49}\text{PO}_2$  (496.71): C, 77.38; H, 9.94. Found: C, 77.47; H, 10.16. HRMS (FAB) calcd for  $\text{C}_{32}\text{H}_{50}\text{O}_2\text{P}$  ( $\text{MH}^+$ ) 497.3549, found 497.3548.

**3,4,5,6-tetrachlorobenzo-2-(2,6-dimesityl-phenyl)-1,3,2-dioxaphospholane (3a).** To 0.230 g (0.547 mmol) of  $\text{DmpP}=\text{PMe}_3$  in 5 mL of toluene was added 0.135 g (0.547 mmol) of tetrachloro-*o*-benzoquinone in 5 mL of toluene slowly with stirring at  $-35^\circ\text{C}$ . The yellow color changed to greenish brown during the reaction. The solvent was removed under reduced pressure after 0.5 h. The solid was extracted with *n*-hexane and filtered. White crystals were obtained from *n*-hexane at  $-35^\circ\text{C}$  overnight. Yield: 0.146 g (45.1 %). m. p.  $234\text{--}235^\circ\text{C}$ .  $^1\text{H}$  NMR (300 MHz,  $\text{CDCl}_3$ ):  $\square = 2.03$  (s, 12H); 2.26 (s, 6H); 6.81 (s, 4H); 7.12 (dd, 2H,  $^3J_{\text{HH}} = 7.6$  Hz,  $^4J_{\text{PH}} = 2.0$  Hz); 7.66 (t, 1H,  $J = 7.6$  Hz).  $^{13}\text{C}\{^1\text{H}\}$  NMR (50.3 MHz,  $\text{CDCl}_3$ ):  $\square = 21.04$  (s); 21.16 (s); 127.96 (s); 130.05 (d,  $J = 1.8$  Hz); 134.14 (s); 135.46 (d,  $J = 8.0$ ); 136.15 (d,  $J = 2.2$  Hz); 137.59 (s); 137.80 (s); 138.59 (s); 144.52 (s); 147.29 (s); 147.81 (s).  $^{31}\text{P}\{^1\text{H}\}$  (121.5 MHz,  $\text{CDCl}_3$ ):  $\square = 230.1$ . Anal. Calcd for  $\text{C}_{30}\text{H}_{25}\text{PO}_2\text{Cl}_4$  (590.31): C, 61.04; H, 4.27. Found: C, 61.26; H, 4.40. HRMS (FAB) calcd for  $\text{C}_{30}\text{H}_{26}\text{O}_2\text{PCl}_4$  ( $\text{MH}^+$ ) 589.0425, found 589.0424.

**3,4,5,6-tetrachlorobenzo-2-(2,4,6-tri-tert-butylphenyl)-1,3,2-dioxaphospholane (3b).** To 0.375 g (1.06 mmol)  $\text{Mes}^*\text{P}=\text{PMe}_3$  in 6 mL of toluene was added 0.262 g (1.06 mmol) tetrachloro-*o*-benzoquinone in 6 mL of toluene dropwise with stirring. The yellow color changed to greenish brown upon mixing. The reaction was complete after 0.5 h (as judged by  $^{31}\text{P}$  NMR spectroscopy). The solvent was removed under reduced pressure. The solid was extracted by *n*-hexane. A white crystalline solid was obtained after recrystallization twice from *n*-hexane at  $-35^\circ\text{C}$ . Yield: 0.222 g (40.0 %).  $^1\text{H}$  NMR (300 MHz,  $\text{CDCl}_3$ ):  $\square = 1.21$  (s, 9H); 1.54 (d, 18H,  $J = 1.1$  Hz); 7.13 (d, 2H,  $J = 1.1$  Hz).  $^{31}\text{P}\{^1\text{H}\}$  NMR (121.5 MHz,  $\text{CDCl}_3$ ):  $\square = 217.5$ .
